# Supplementary material for: Zn(ii)-coordination-driven chiroptical and emissive sensing for chiral amines using a quaterphenyl-5′-carbaldehyde
Source: Royal Society of Chemistry journal article supplement (doi:10.1039/d2nj04781k), 2022-01-01
Supplement: d2nj04781k1.pdf [file d2nj04781k1.pdf]

## Electronic Supporting Information

### Zn(II)-coordination-driven chiroptical and emissive sensing for chiral amines using a quaterphenyl-5'-carbaldehyde

Koichiro Omasa, Masato Ito and Yuji Kubo,\*

*Department of Applied Chemistry, Graduate School of Urban Environmental Sciences, Tokyo Metropolitan University, 1-1 Minami-Osawa, Hachioji, Tokyo, 192-0397*

#### Table of contents

|                                                                                                                                                                |             |
|----------------------------------------------------------------------------------------------------------------------------------------------------------------|-------------|
| <b>Fig. S1.</b> FAB-MS spectra of <b>1@(<i>S</i>)-G1</b> and Zn(II)-coordinated <b>1@(<i>S</i>)-G1</b> .                                                       | S-2         |
| <b>Fig. S2.</b> UV/Vis absorption and CD spectra of imines <b>1@(<i>S</i>)/(<i>R</i>)-G</b> in the presence or absence of Zn(II).                              | S-3 ~ S-4   |
| <b>Table S1.</b> UV/Vis absorption and CD data of <b>1@(<i>S</i>)/(<i>R</i>)-G<sub><i>n</i></sub> (<i>n</i> = 1 ~ 9)</b> in the presence or absence of Zn(II). | S-5         |
| <b>Fig. S3.</b> Proposed Zn(II)-coordinated structure <b>1@(<i>R</i>)-G1</b> .                                                                                 | S-6         |
| <b>Fig. S4.</b> A plausible mechanism of chiroptical sensing.                                                                                                  | S-6         |
| <b>Fig. S5.</b> CD spectra of Zn(II)-coordinated <b>1@(<i>S</i>)-G7</b> (a) and Zn(II)-coordinated <b>1@(<i>S</i>)-G9</b> (b) with variable <i>ee</i> values.  | S-6         |
| <b>Fig. S6.</b> <sup>1</sup> H NMR (500 MHz, CDCl <sub>3</sub> ) spectrum of <b>1</b> .                                                                        | S-7         |
| <b>Fig. S7.</b> <sup>13</sup> C NMR (126 MHz, CDCl <sub>3</sub> ) spectrum of <b>1</b> .                                                                       | S-8         |
| <b>Fig. S8.</b> FAB-MS (positive mode) spectrum of <b>1</b> .                                                                                                  | S-9         |
| <b>Fig. S9.</b> <sup>1</sup> H NMR (500 MHz, CDCl <sub>3</sub> ) spectrum of <b>3</b> .                                                                        | S-10        |
| <b>Fig. S10.</b> <sup>13</sup> C NMR (126 MHz, CDCl <sub>3</sub> ) spectrum of <b>3</b> .                                                                      | S-11        |
| <b>Fig. S11.</b> FAB-MS (positive mode) spectrum of <b>3</b> .                                                                                                 | S-12        |
| <b>Fig. S12.</b> <sup>1</sup> H NMR (500 MHz, CDCl <sub>3</sub> ) spectrum of <b>4</b> .                                                                       | S-13        |
| <b>Fig. S13.</b> <sup>13</sup> C NMR (126 MHz, CDCl <sub>3</sub> ) spectrum of <b>4</b> .                                                                      | S-14        |
| <b>Fig. S14.</b> FAB-MS (positive mode) spectrum of <b>4</b> .                                                                                                 | S-15        |
| <b>Fig. S15.</b> The B-ring, denoted in Scheme 1, is tilted by 46.4° with respect to the C-ring.                                                               | S-16        |
| Single crystal X-ray diffraction study for <b>1</b>                                                                                                            | S-17 ~ S-24 |

(a)

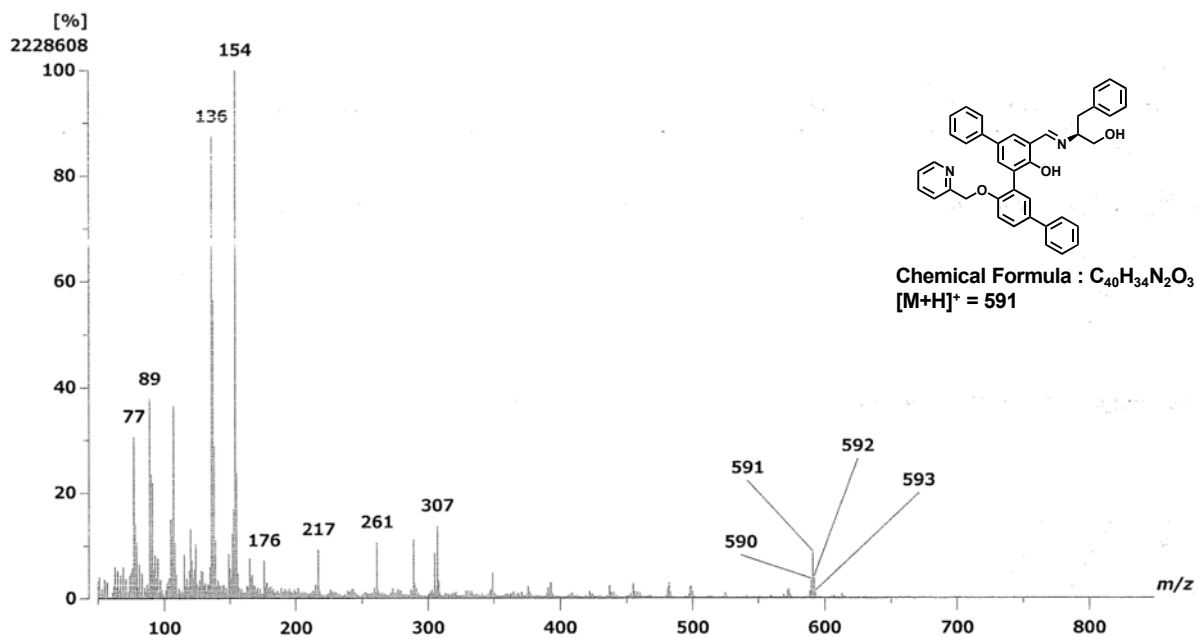

(b)

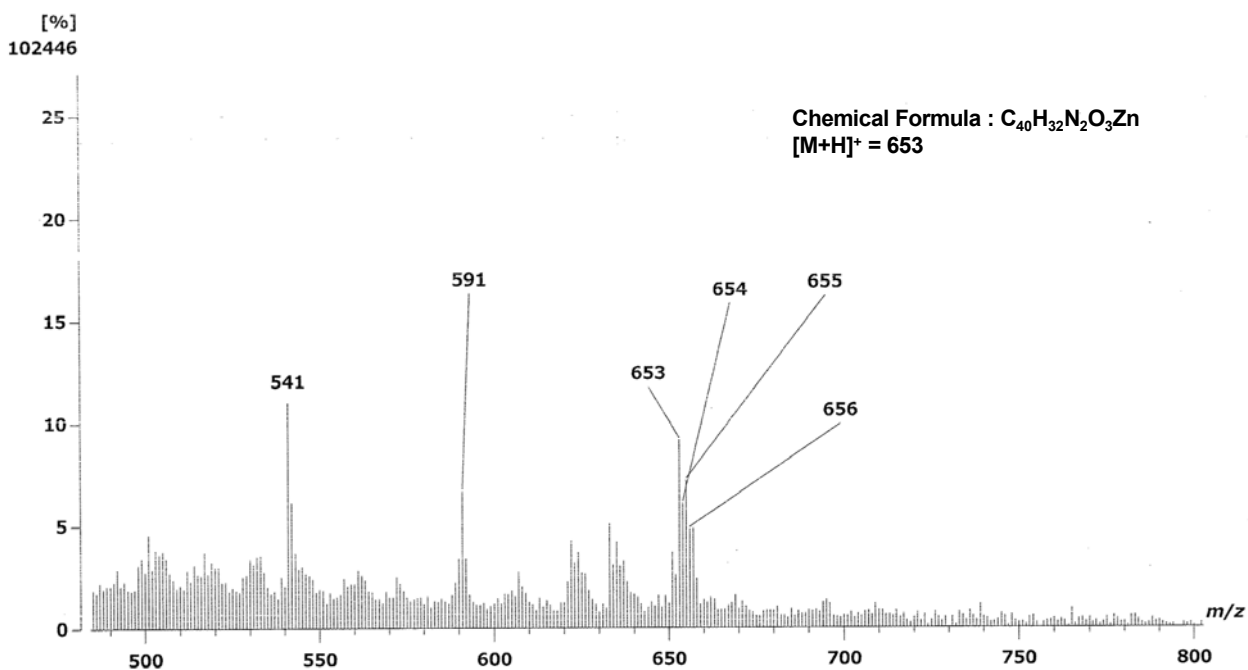

Fig. S1. FAB-MS spectra of **1@S-G1** (a) and Zn(II)-coordinated **1@S-G1**(b).

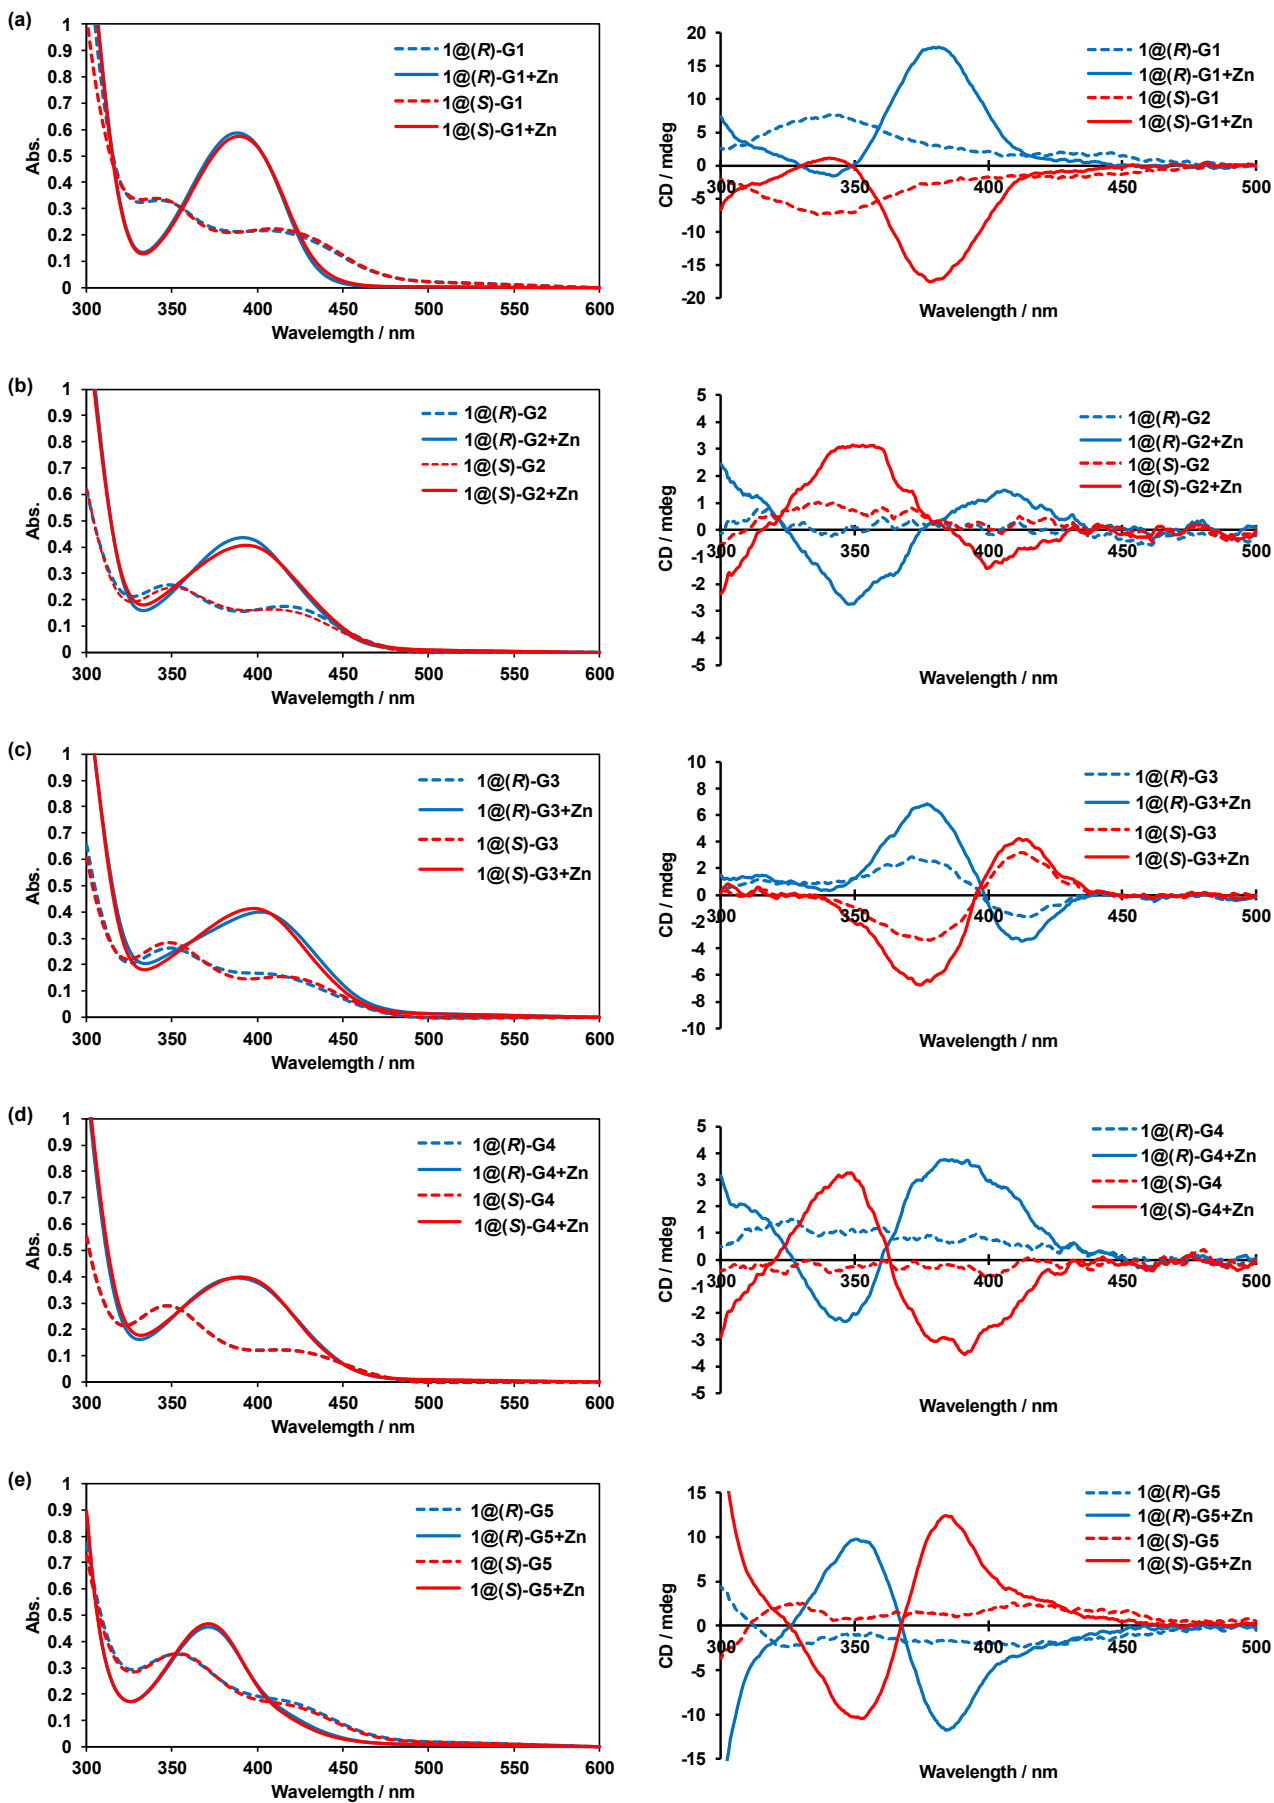

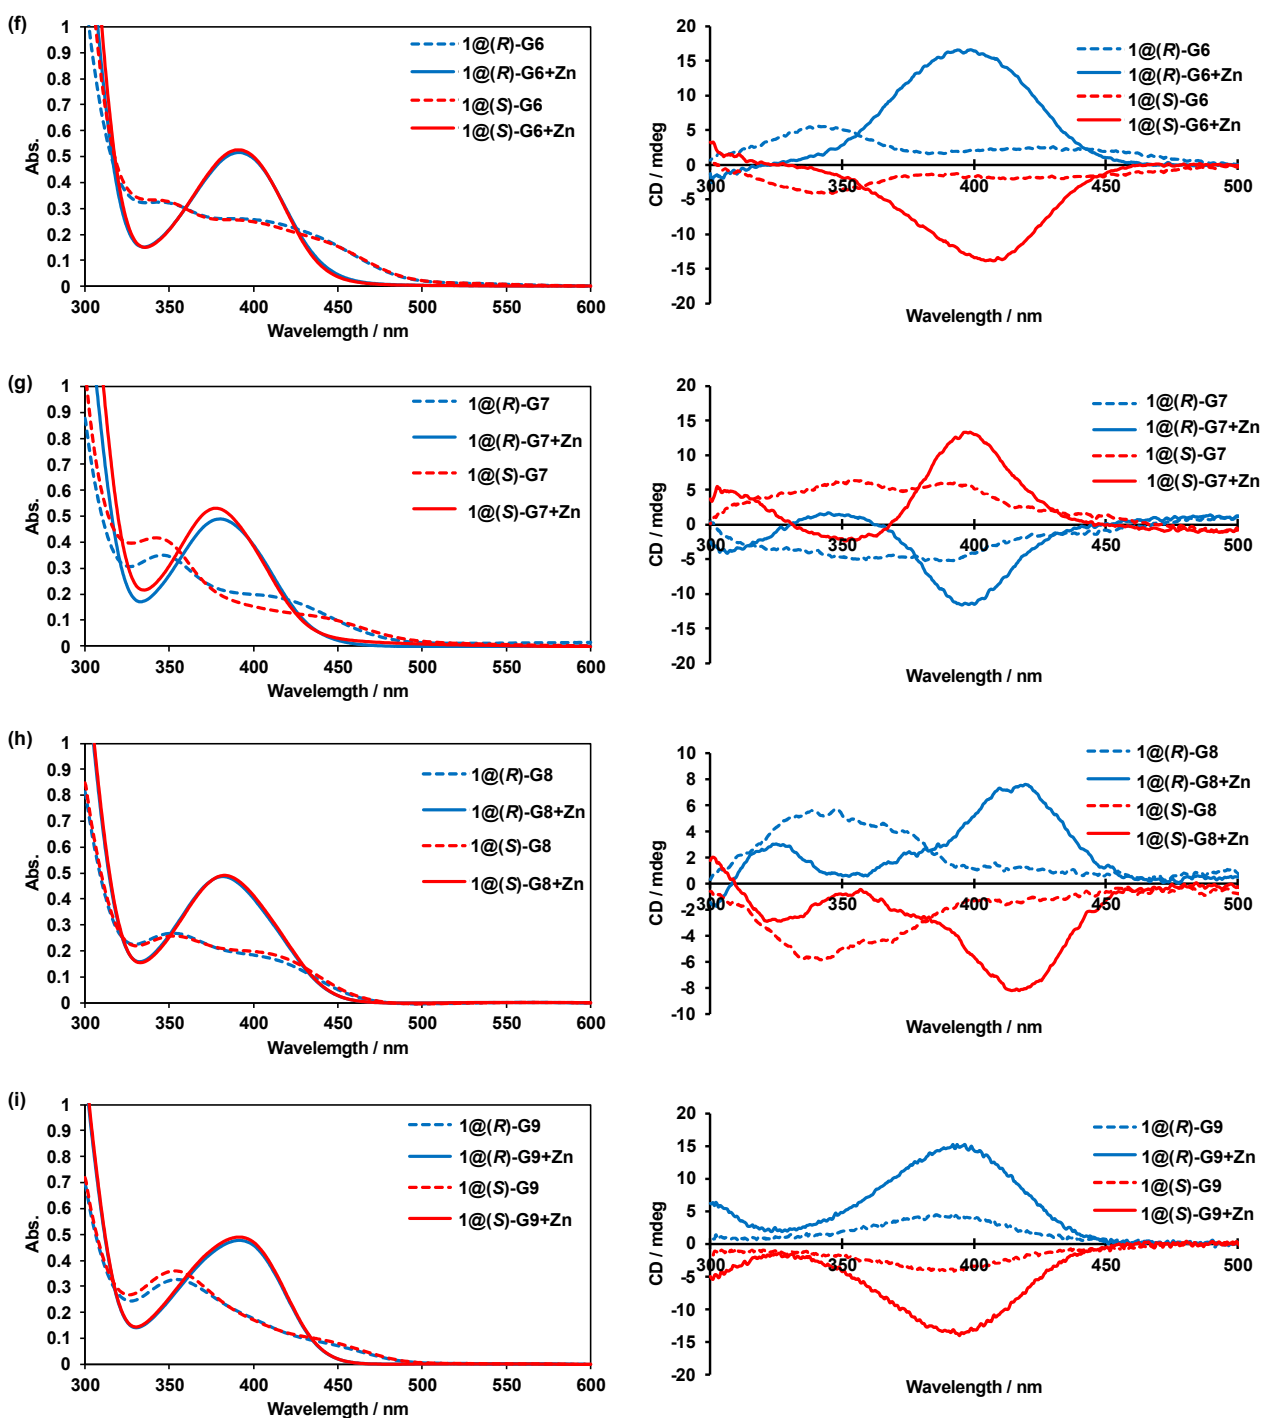

**Fig. S2.** UV/Vis absorption and CD spectra of imines  $1@(\text{S})/(\text{R})\text{-G}_n$  ( $n = 1 \sim 9$ ) in the presence or absence of  $\text{Zn}(\text{II})$  in MeOH.

**Table S1.** UV/Vis ( $\epsilon$ , in  $\text{cm}^{-1}\text{M}^{-1}$ ) and CD ( $\Delta\epsilon$ , in  $\text{cm}^{-1}\text{M}^{-1}$ ) data of **1@(*S*)/(*R*)-G<sub>*n*</sub>** (*n* = **1 ~ 9**) in the presence or absence of Zn(II) in MeOH.

|                                | UV-Vis [ $\epsilon$ (nm)] | CD [ $\Delta\epsilon$ (nm)] | $g_{\text{abs}} (=  A /\epsilon) (\times 10^{-3})^a$ |
|--------------------------------|---------------------------|-----------------------------|------------------------------------------------------|
| <b>1</b>                       | 5700 (414)                | -                           | -                                                    |
| <b>1@(<i>R</i>)-G1</b>         | 2240 (413), 3320 (344)    | 23.2 (341)                  | 7.0                                                  |
| <b>1@(<i>S</i>)-G1</b>         | 2170 (413), 3400 (340)    | -22.4 (341)                 | 6.6                                                  |
| <b>1@(<i>R</i>)-G1+ Zn(II)</b> | 5870 (388)                | 53.9 (380), -4.80 (342)     | 10                                                   |
| <b>1@(<i>S</i>)-G1+ Zn(II)</b> | 5740 (389)                | -53.1 (379), 3.48 (341)     | 9.8                                                  |
| <b>1@(<i>R</i>)-G2</b>         | 1750 (415), 2560 (348)    | 3.32 (359)                  | 1.3                                                  |
| <b>1@(<i>S</i>)-G2</b>         | 1620 (409), 2450 (350)    | -3.37 (355)                 | 1.4                                                  |
| <b>1@(<i>R</i>)-G2+ Zn(II)</b> | 4080 (393)                | 4.30 (400), -9.56 (349)     | 3.4                                                  |
| <b>1@(<i>S</i>)-G2+ Zn(II)</b> | 4370 (392)                | -4.30 (400), 9.56 (349)     | 3.2                                                  |
| <b>1@(<i>R</i>)-G3</b>         | 1580 (414), 2630 (350)    | 8.20 (417), -10.4 (378)     | 7.1                                                  |
| <b>1@(<i>S</i>)-G3</b>         | 1540 (413), 2830 (349)    | -4.97 (415), 8.63 (371)     | 4.8                                                  |
| <b>1@(<i>R</i>)-G3+ Zn(II)</b> | 4000 (402)                | 12.5 (414), -20.4 (374)     | 8.2                                                  |
| <b>1@(<i>S</i>)-G3+ Zn(II)</b> | 4130 (398)                | -10.2 (414), 20.8 (377)     | 7.5                                                  |
| <b>1@(<i>R</i>)-G4</b>         | 3300 (414), 2760 (348)    | 4.62 (326)                  | 1.7                                                  |
| <b>1@(<i>S</i>)-G4</b>         | 3160 (410), 2770 (346)    | -1.63 (324)                 | 0.59                                                 |
| <b>1@(<i>R</i>)-G4+ Zn(II)</b> | 3940 (388)                | 11.3 (392), -7.10 (346)     | 4.7                                                  |
| <b>1@(<i>S</i>)-G4+ Zn(II)</b> | 3990 (390)                | -10.8 (391), 9.87 (347)     | 5.2                                                  |
| <b>1@(<i>R</i>)-G5</b>         | 1760 (416), 3520 (352)    | -7.32 (413), -7.06 (325)    | 4.2                                                  |
| <b>1@(<i>S</i>)-G5</b>         | 1620(416), 3530 (354)     | 7.69 (409), 7.30 (326)      | 4.7                                                  |
| <b>1@(<i>R</i>)-G5+ Zn(II)</b> | 4560(372)                 | -35.5 (384), 29.8 (351)     | 14                                                   |
| <b>1@(<i>S</i>)-G5+ Zn(II)</b> | 4670 (372)                | 37.6 (384), -31.4 (351)     | 15                                                   |
| <b>1@(<i>R</i>)-G6</b>         | 2600 (392), 3240 (342)    | 7.90 (430), 15.6 (335)      | 4.8                                                  |
| <b>1@(<i>S</i>)-G6</b>         | 2550 (389), 3320 (342)    | -6.04 (433), -12.8 (339)    | 3.8                                                  |
| <b>1@(<i>R</i>)-G6+ Zn(II)</b> | 5150 (392)                | 50.3 (399)                  | 9.8                                                  |
| <b>1@(<i>S</i>)-G6+ Zn(II)</b> | 5250 (391)                | -41.8 (405)                 | 8.0                                                  |
| <b>1@(<i>R</i>)-G7</b>         | 1920 (410), 3500 (346)    | -16.1 (389), -15.3 (356)    | 4.4                                                  |
| <b>1@(<i>S</i>)-G7</b>         | 1340 (416), 4160 (342)    | 17.9 (388), 19.1 (355)      | 4.6                                                  |
| <b>1@(<i>R</i>)-G7+ Zn(II)</b> | 4890 (381)                | -35.0 (398), 5.14 (345)     | 8.2                                                  |
| <b>1@(<i>S</i>)-G7+ Zn(II)</b> | 5290 (377)                | 40.3 (399), -7.25 (351)     | 9.0                                                  |
| <b>1@(<i>R</i>)-G8</b>         | 1610 (416), 2690 (352)    | 16.9 (339)                  | 6.3                                                  |
| <b>1@(<i>S</i>)-G8</b>         | 1760 (415), 2570 (353)    | -17.6 (342)                 | 6.8                                                  |
| <b>1@(<i>R</i>)-G8+ Zn(II)</b> | 4870 (382)                | 22.9 (418), 9.26 (325)      | 4.7                                                  |
| <b>1@(<i>S</i>)-G8+ Zn(II)</b> | 4910 (382)                | -24.9 (417), -8.81 (322)    | 5.1                                                  |
| <b>1@(<i>R</i>)-G9</b>         | 3260 (354)                | 13.1 (393)                  | 4.0                                                  |
| <b>1@(<i>S</i>)-G9</b>         | 3600 (353)                | -12.7 (393)                 | 3.5                                                  |
| <b>1@(<i>R</i>)-G9+ Zn(II)</b> | 4770 (393)                | 45.9 (392)                  | 9.6                                                  |
| <b>1@(<i>S</i>)-G9+ Zn(II)</b> | 4900 (393)                | -42.8 (394)                 | 8.7                                                  |

<sup>a</sup> The amplitude (*A*) of exciton Cotton effects is defined as the difference between the first long-wavelength ( $\Delta\epsilon_1$ ) Cotton effect and the second short-wavelength ( $\Delta\epsilon_2$ ) Cotton effect ( $A = \Delta\epsilon_1 - \Delta\epsilon_2$ ).

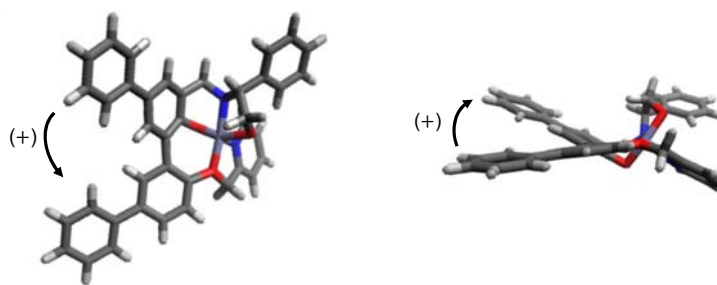

Fig. S3. Proposed Zn(II)-coordinated structure  $1@(R)\text{-G1}$ .

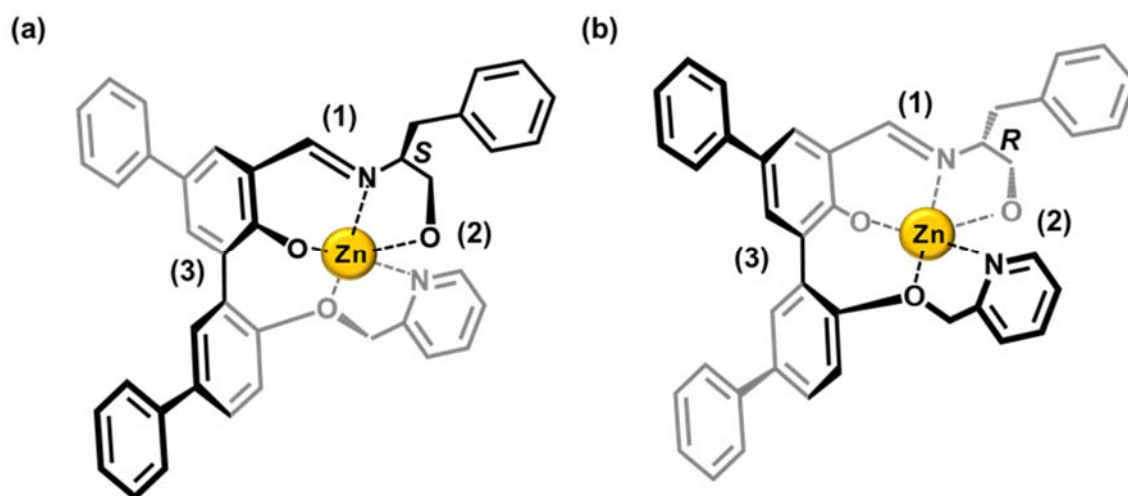

Fig. S4. A plausible mechanism of chiroptical sensing on Zn(II)-coordinated  $1@(S)\text{-G1}$  (a) and the corresponding complex with  $(R)\text{-G1}$  (b).

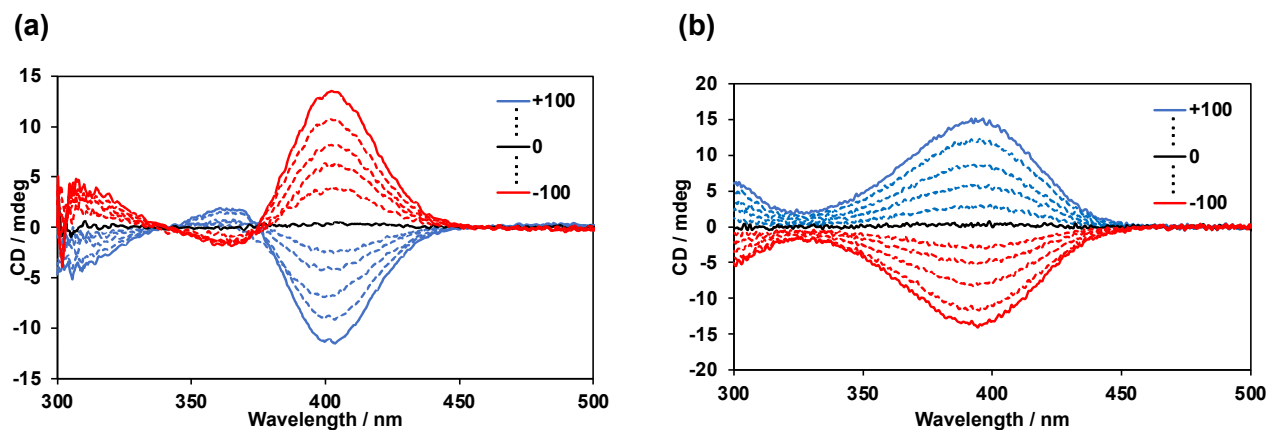

Fig. S5. CD spectra of Zn(II)-coordinated  $1@(S)\text{-G7}$  (a) and Zn(II)-coordinated  $1@(S)\text{-G9}$  (b) with variable  $ee$  values.

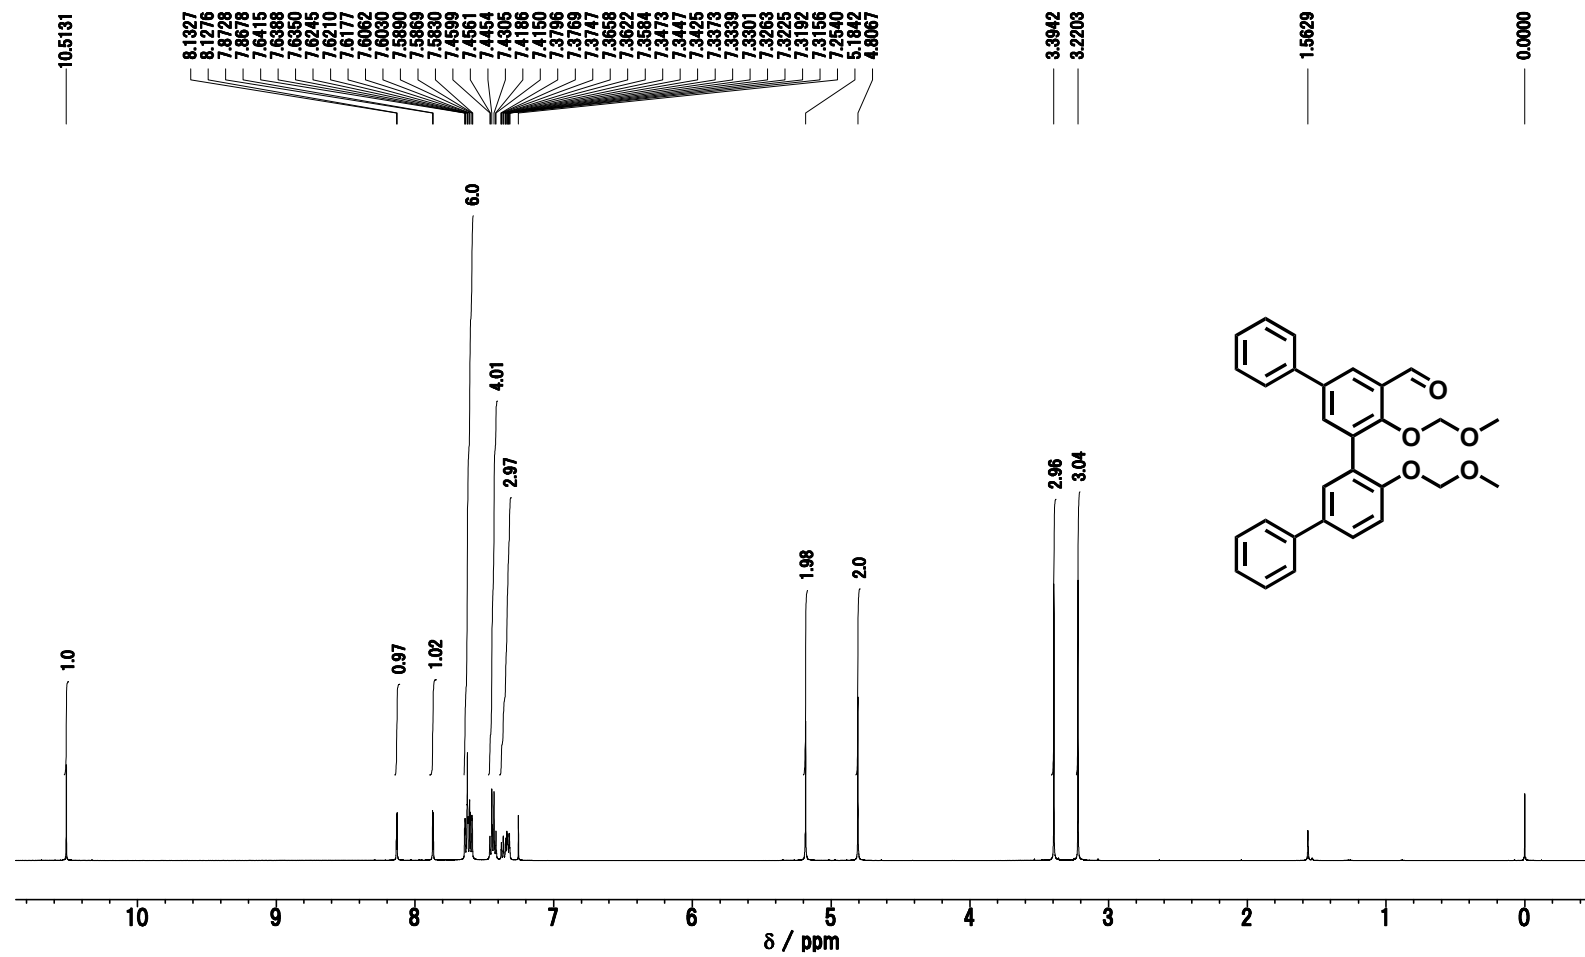

Fig. S6.  $^1\text{H}$  NMR (500 MHz,  $\text{CDCl}_3$ ) spectrum of **3**.

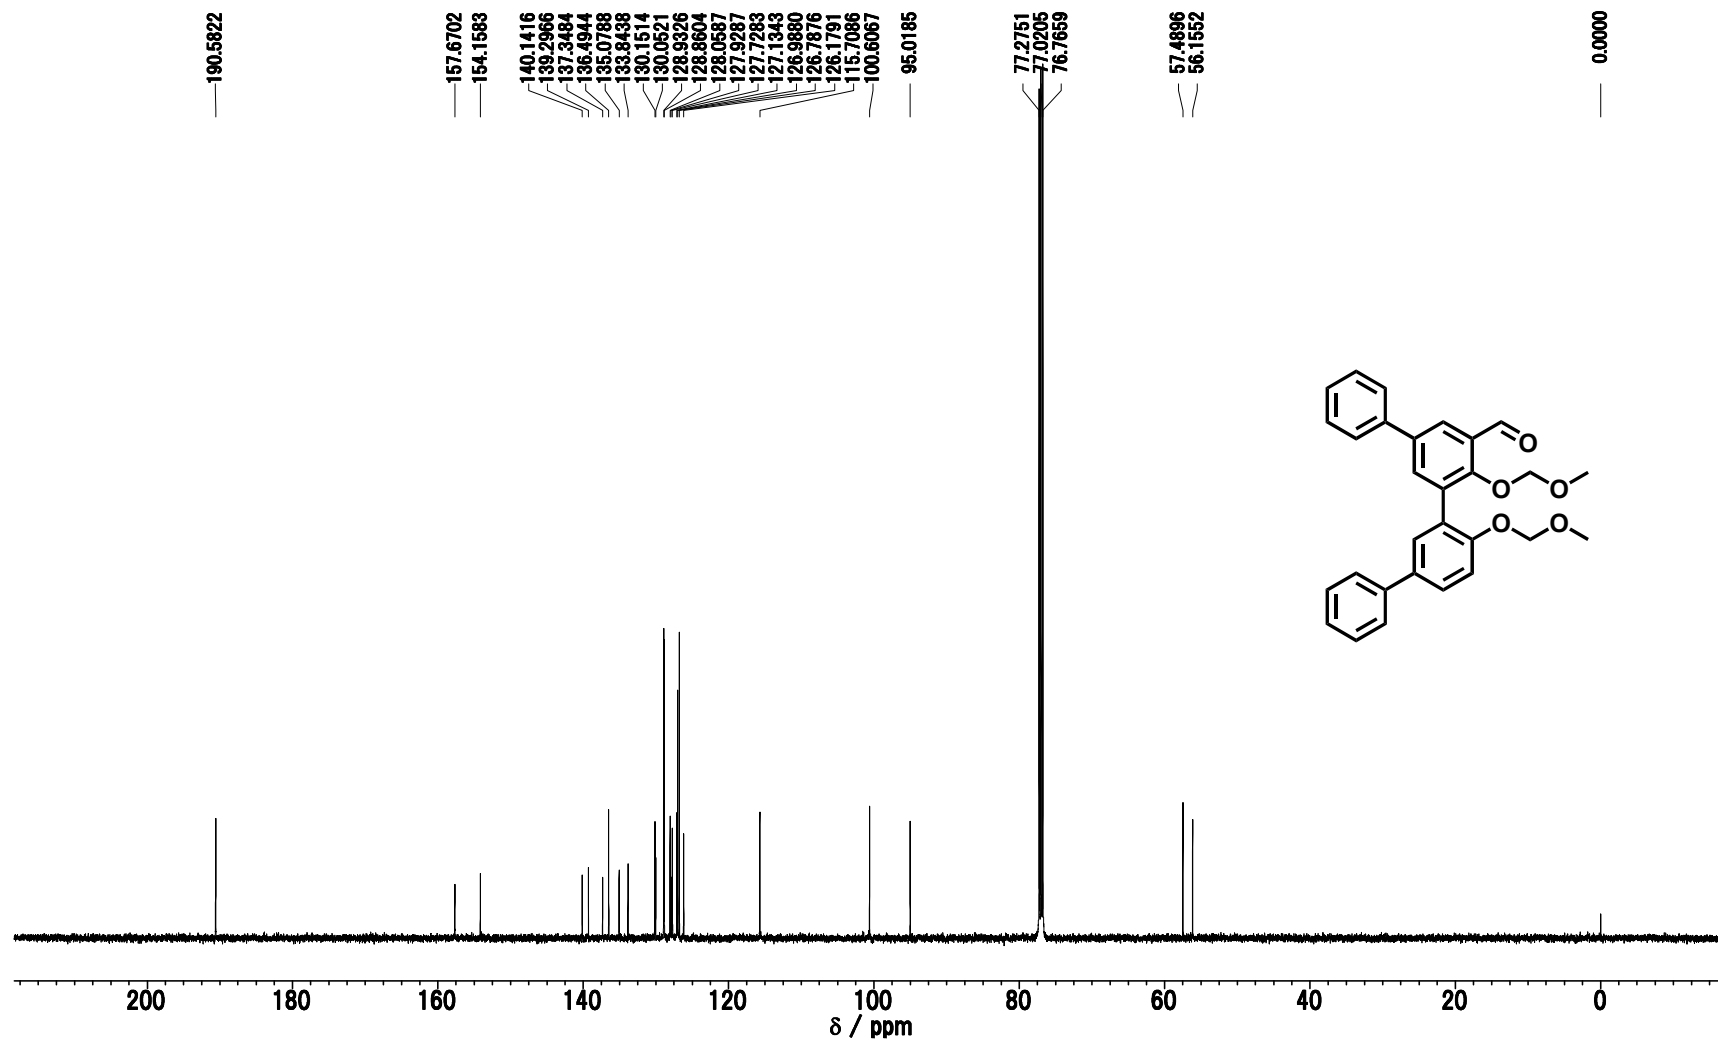

Fig. S7. <sup>13</sup>C NMR (126 MHz, CDCl<sub>3</sub>) spectrum of 3.



[ Mass Spectrum ]  
Data : 20220831\_1\_001    Date : 31-Aug-2022 14:55  
Instrument : MStation  
Sample : -  
Inlet : Direct    Ion Mode : FAB+  
Spectrum Type : Normal Ion [MF-Linear]  
Scan# : (1,8)  
BP : m/z 348    Int. : 23.73 (248871)  
Output m/z range : 50 to 505    Cut Level : 0.00 %

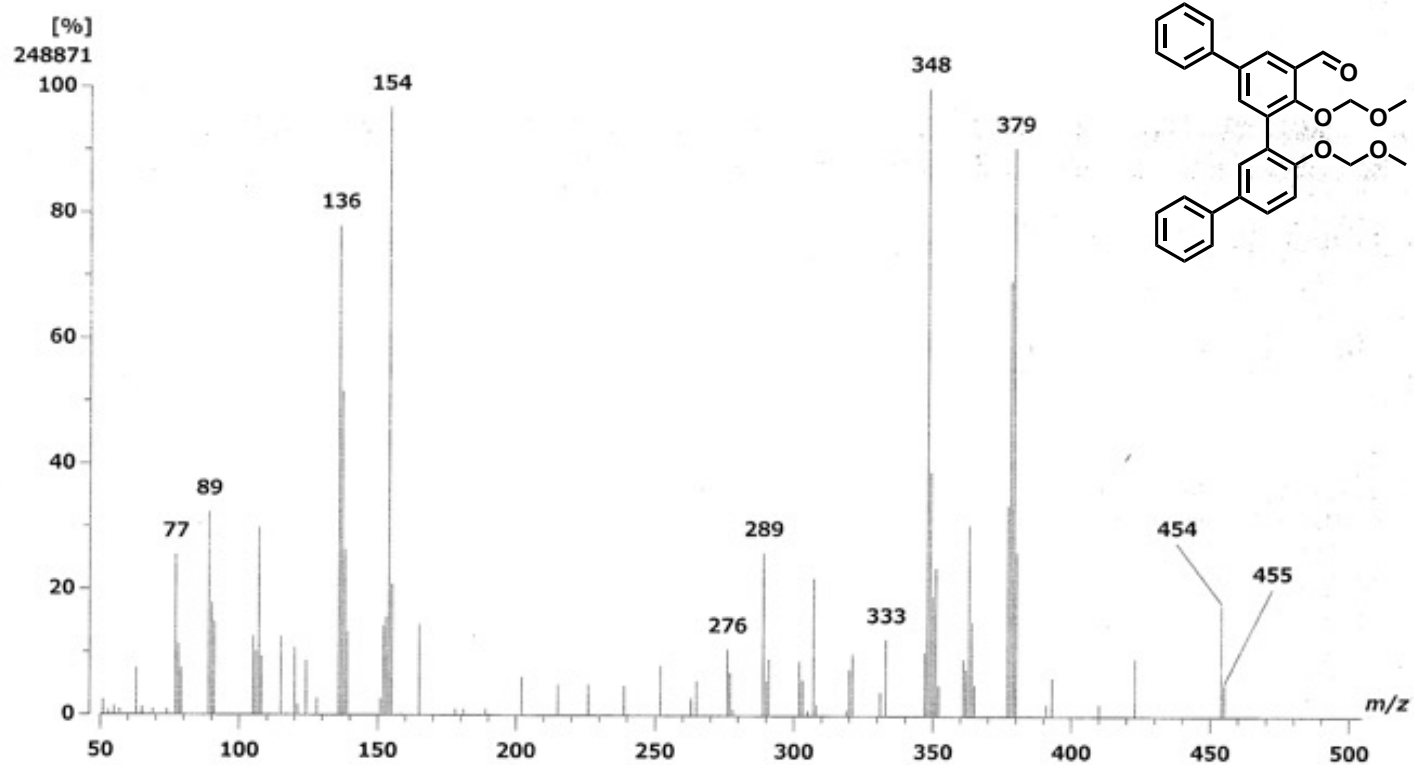

Fig. S8. FAB-MS (positive mode) spectrum of 3.

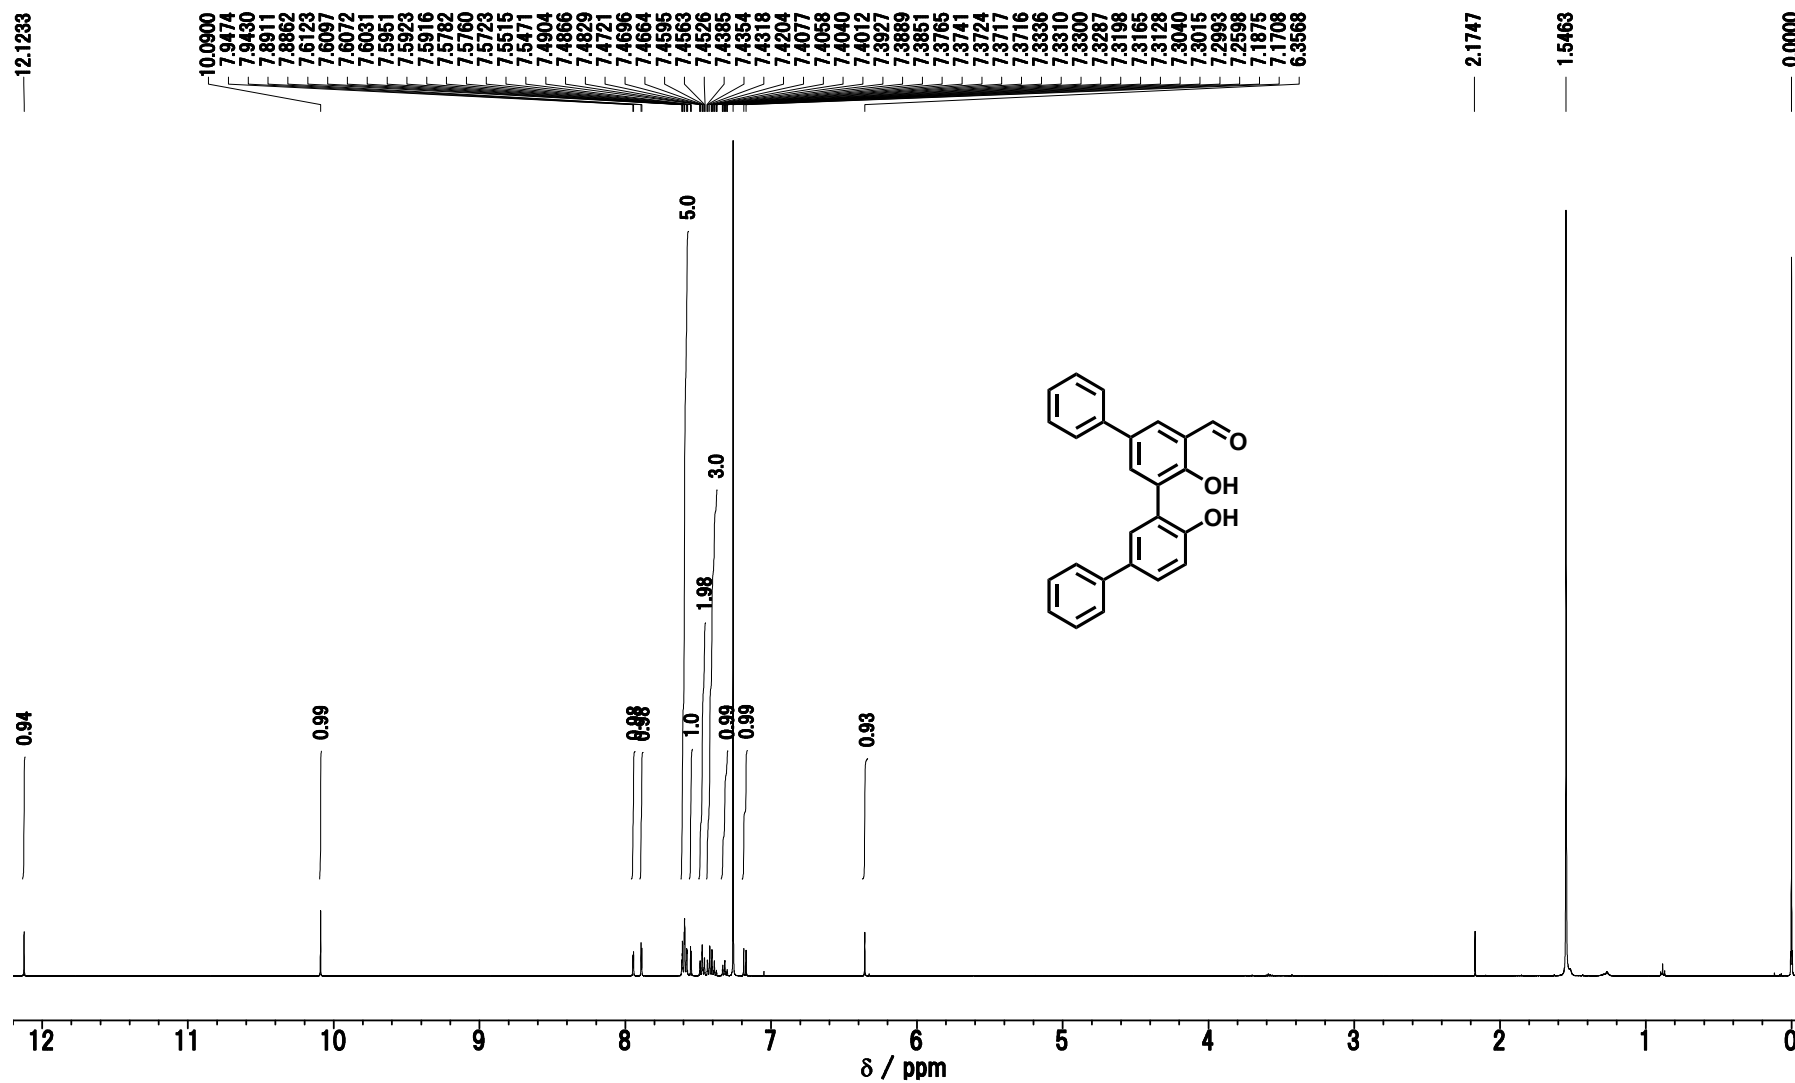

Fig. S9. <sup>1</sup>H NMR (500 MHz, CDCl<sub>3</sub>) spectrum of 4.

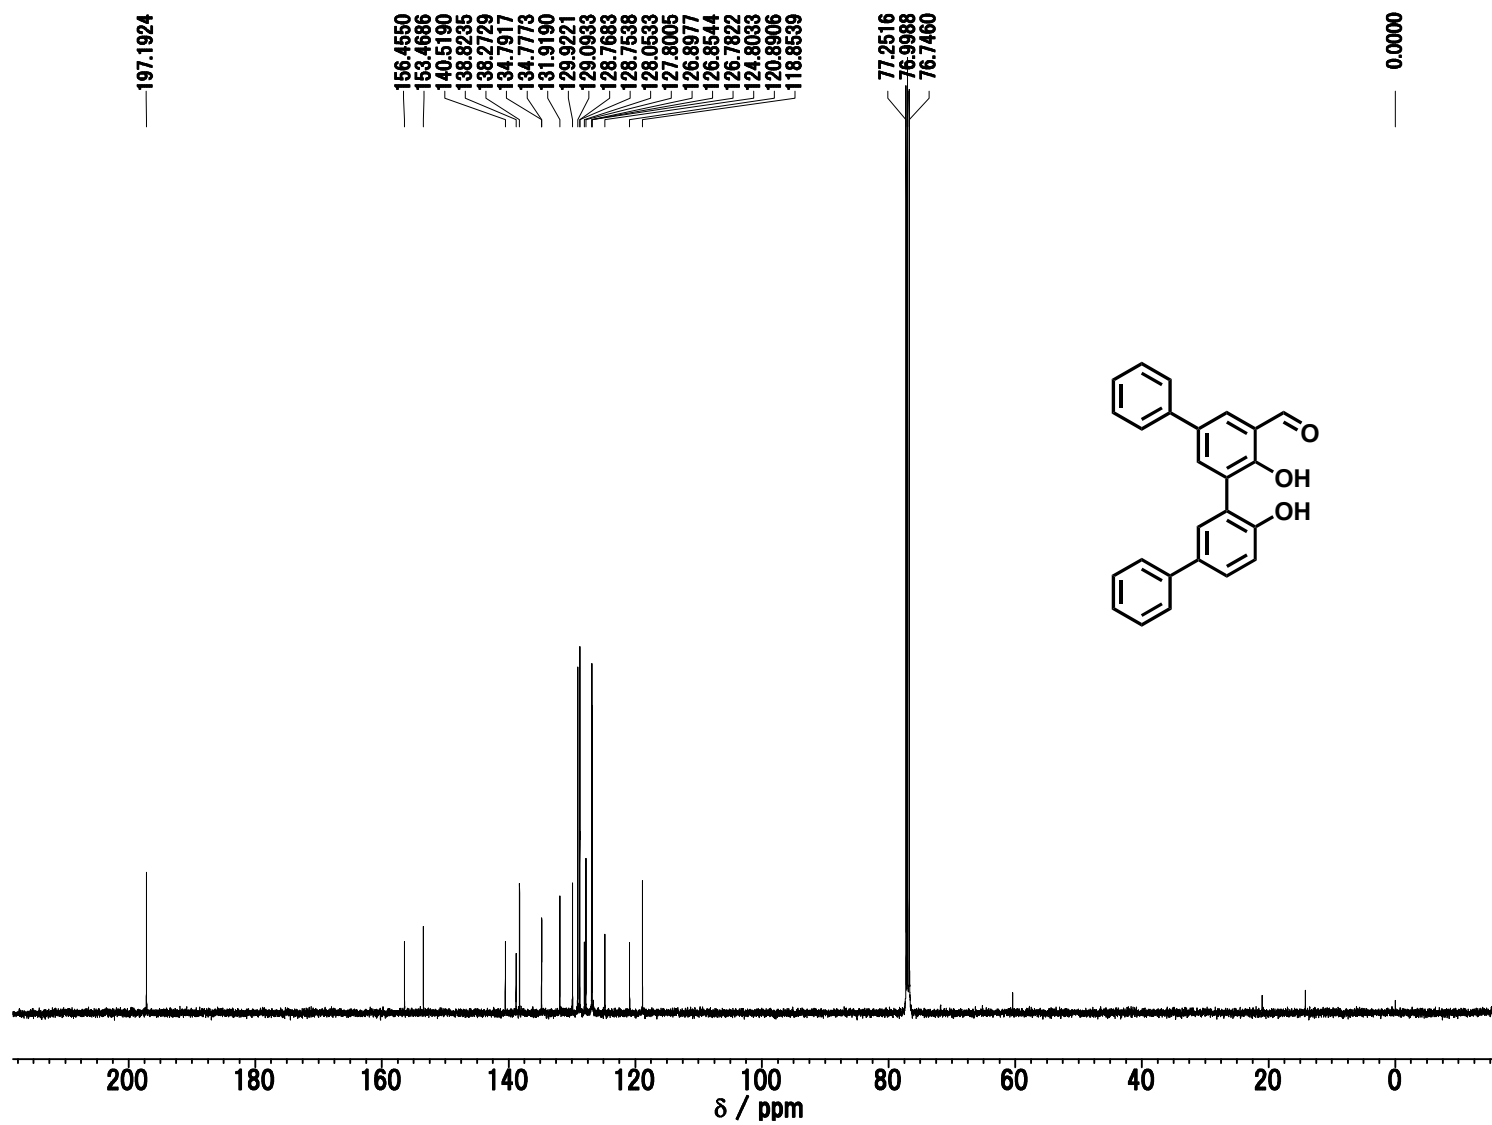

Fig. S10.  $^{13}\text{C}$  NMR (126 MHz,  $\text{CDCl}_3$ ) spectrum of 4.

[ Mass Spectrum ]

Data : 20220831\_2\_002 Date : 31-Aug-2022 15:05

Instrument : MStation

Sample : -

Inlet : Direct Ion Mode : FAB+

Spectrum Type : Normal Ion [MF-Linear]

Scan# : (1,6)

BP : m/z 154 Int. : 65.90 (691016)

Output m/z range : 50 to 499 Cut Level : 0.00 %

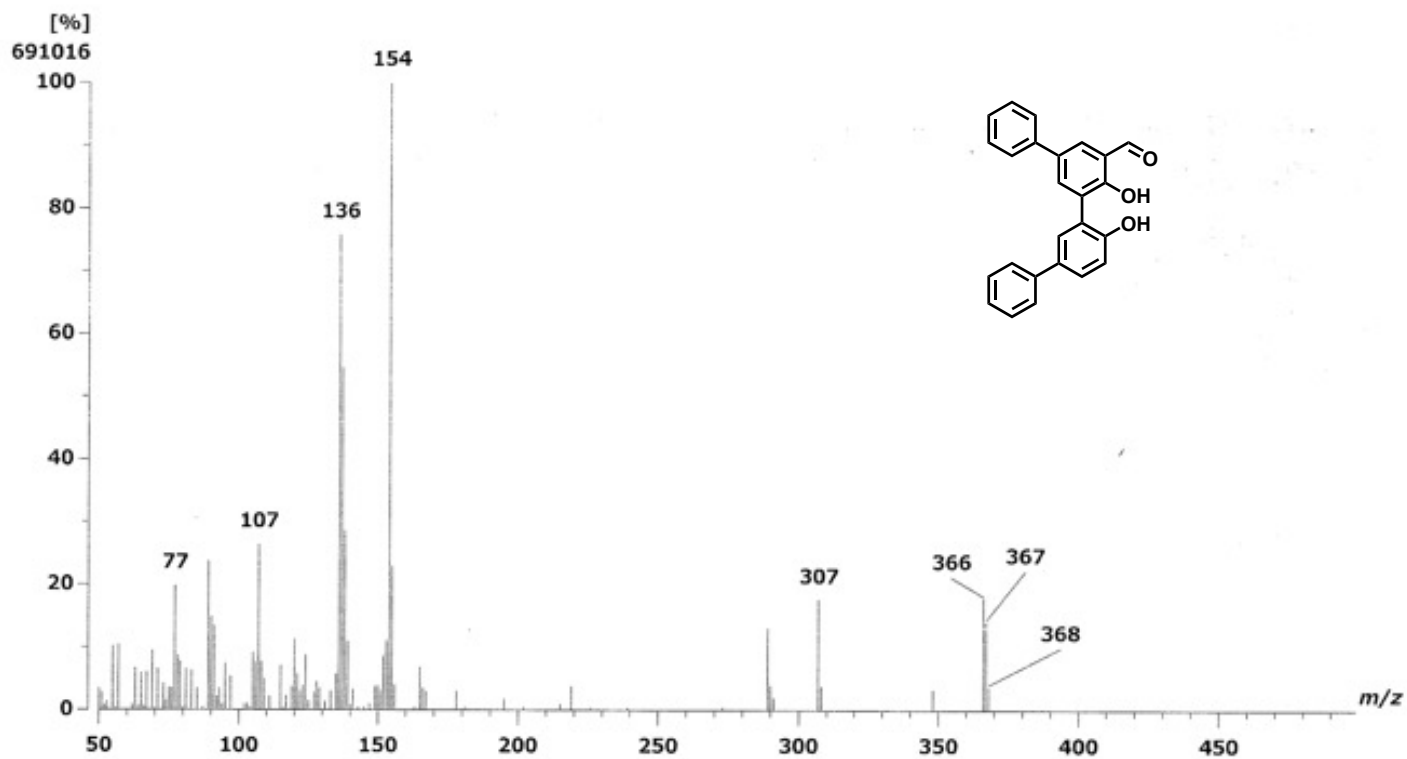

Fig. S11. FAB-MS (positive mode) spectrum of 4.

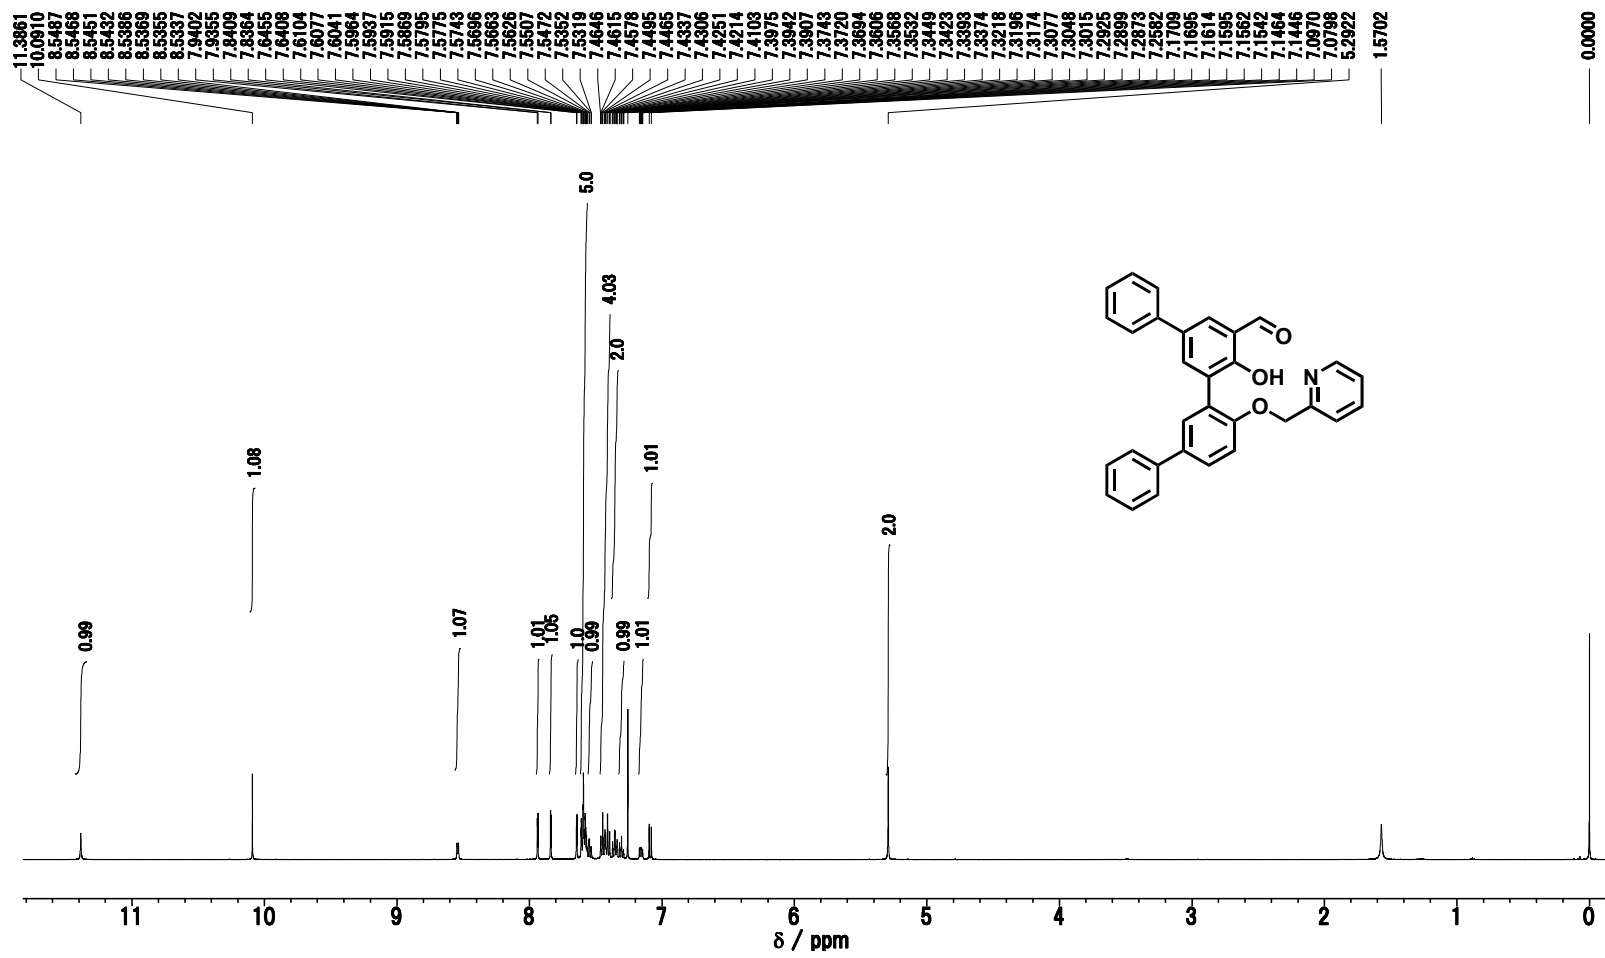

Fig. S12. <sup>1</sup>H NMR (500 MHz, CDCl<sub>3</sub>) spectrum of 1.

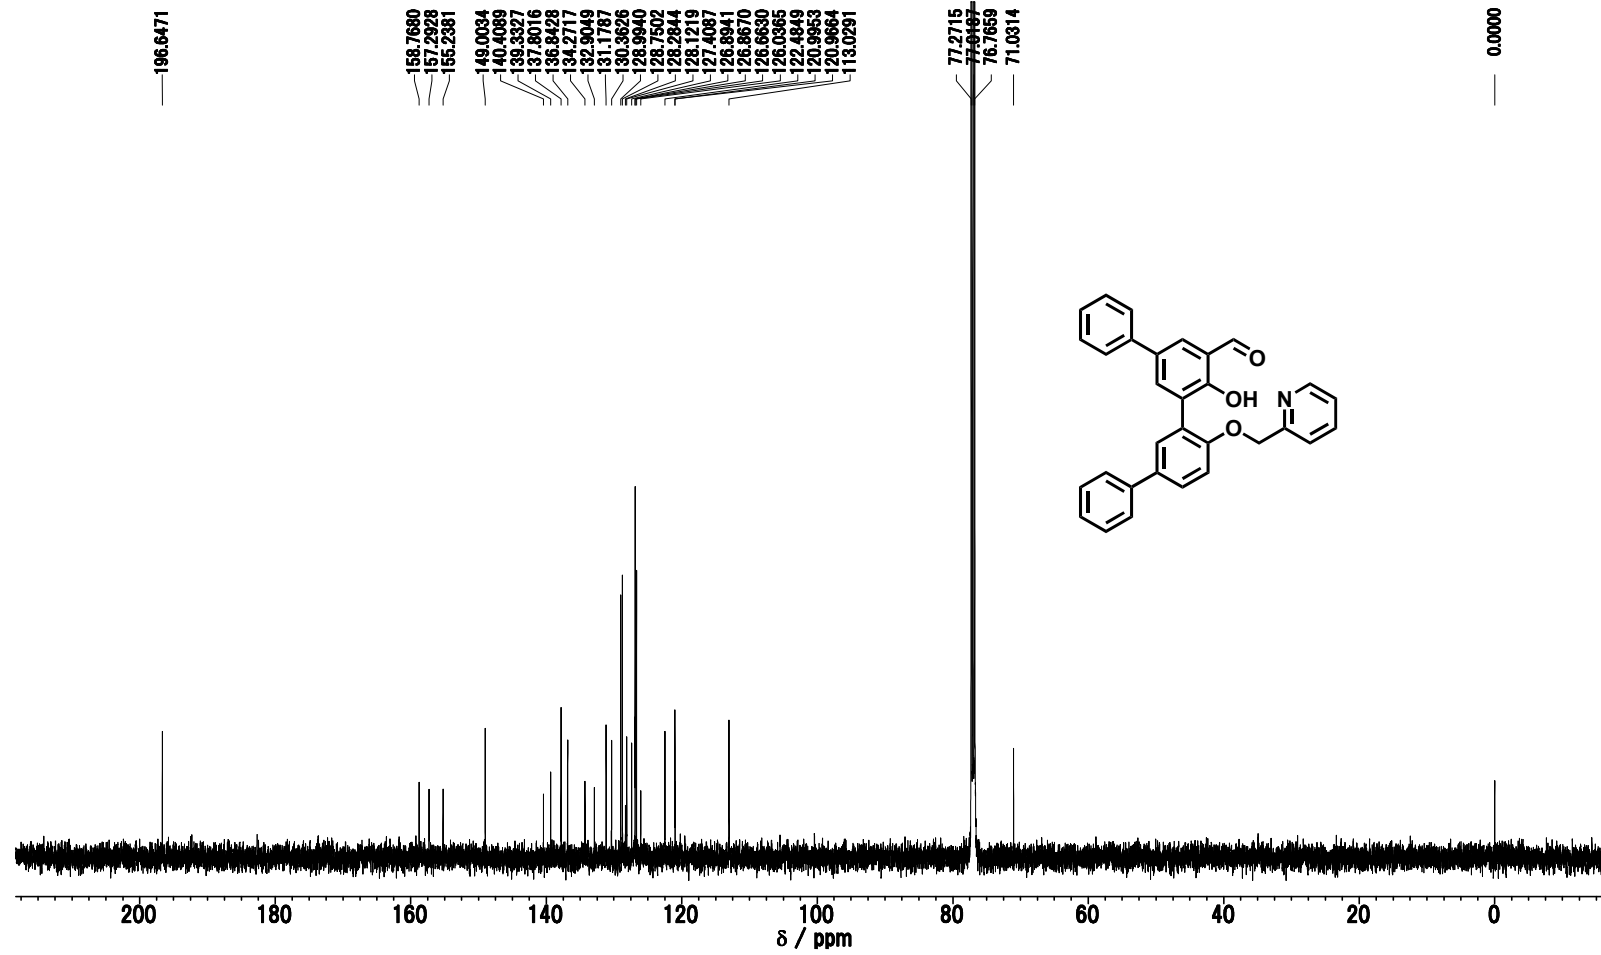

Fig. S13.  $^{13}\text{C}$  NMR (126 MHz,  $\text{CDCl}_3$ ) spectrum of 1.

[ Mass Spectrum ]  
Data : 20220831\_3\_003    Date : 31-Aug-2022 15:16  
Instrument : MStation  
Sample : -  
Inlet : Direct    Ion Mode : FAB+  
Spectrum Type : Normal Ion [MF-Linear]  
Scan# : (1,8)  
BP : m/z 458    Int. : 9.28 (97259)  
Output m/z range : 50 to 499    Cut Level : 0.00 %

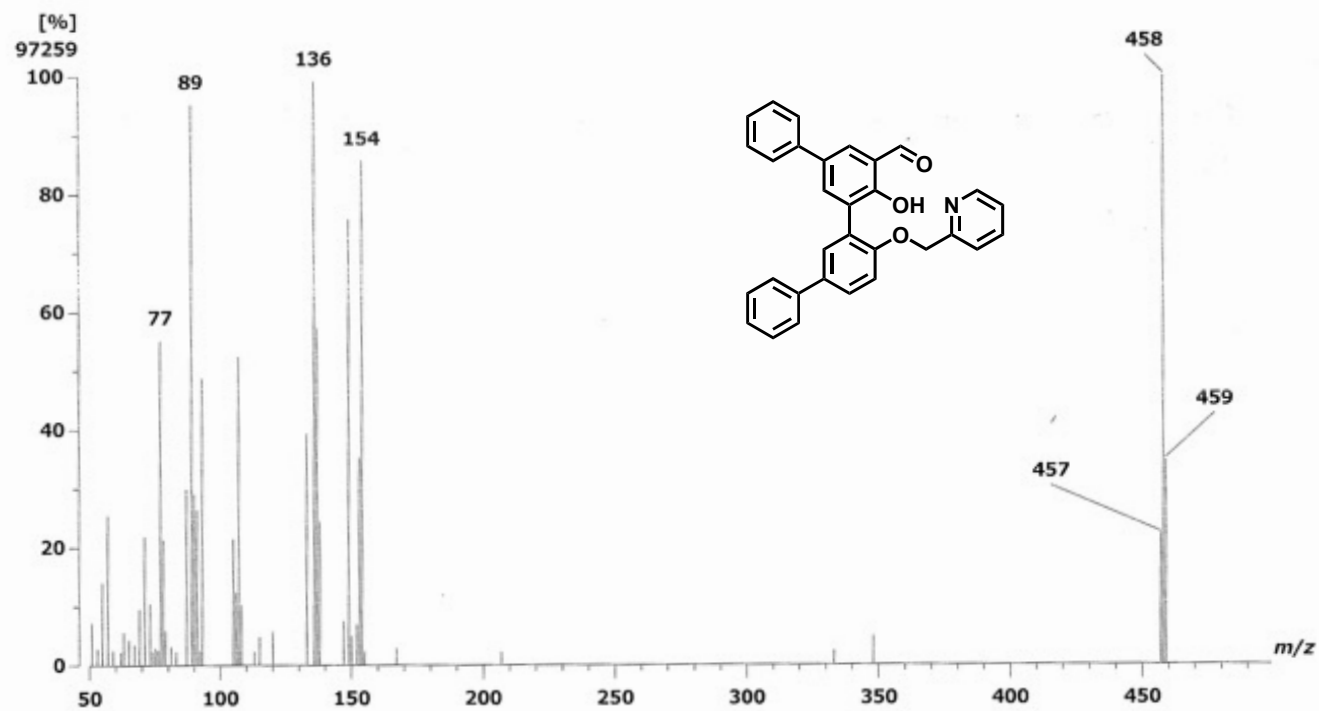

Fig. S14. FAB-MS (positive mode) spectrum of 1.

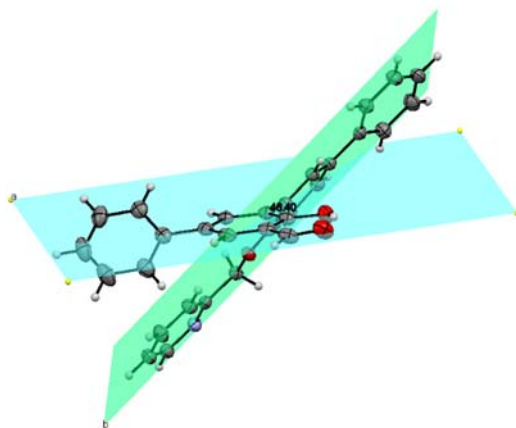

**Fig. S15.** The B-ring, denoted in Scheme 1, is tilted by  $46.4^\circ$  with respect to the C-ring.



Single Crystal Structure Report for compound **1** (CCDC No. 2207715)

A specimen of C<sub>31</sub>H<sub>23</sub>NO<sub>3</sub> was used for the X-ray crystallographic analysis. The X-ray intensity data were measured on a Bruker D8 goniometer system equipped with a sealed tube (CuK $\alpha$ ,  $\lambda = 1.54178$  Å) and a multilayered conforcal mirror monochromator.

**Table S2.** Data collection details for compound **1**.

| Axis  | dx/mm  | 2 $\theta$ /° | $\omega$ /° | $\phi$ /° | $\chi$ /° | Width/° | Frames | Time/s | Wavelength/Å | Voltage/kV | Current/mA | Temperature/K |
|-------|--------|---------------|-------------|-----------|-----------|---------|--------|--------|--------------|------------|------------|---------------|
| Phi   | 50.017 | 55.00         | 0.00        | 0.00      | 54.78     | 2.00    | 90.00  | 1.00   | 1.54184      | 50         | 1.1        | 120           |
| Phi   | 34.017 | -30.00        | -45.00      | 0.00      | 54.78     | 0.40    | 500.00 | 1.00   | 1.54184      | 50         | 1.1        | 120           |
| Omega | 34.017 | 100.00        | -64.00      | 0.00      | 54.74     | 0.40    | 375.00 | 1.00   | 1.54184      | 50         | 1.1        | 120           |
| Omega | 34.017 | 100.00        | -64.00      | 72.00     | 54.74     | 0.40    | 375.00 | 1.00   | 1.54184      | 50         | 1.1        | 120           |
| Omega | 34.017 | 100.00        | -64.00      | 144.00    | 54.74     | 0.40    | 375.00 | 1.00   | 1.54184      | 50         | 1.1        | 120           |
| Omega | 34.017 | 100.00        | -64.00      | 216.00    | 54.74     | 0.40    | 375.00 | 1.00   | 1.54184      | 50         | 1.1        | 120           |
| Omega | 34.017 | 100.00        | -64.00      | 288.00    | 54.74     | 0.40    | 375.00 | 1.00   | 1.54184      | 50         | 1.1        | 120           |

A total of 2465 frames were collected. The total exposure time was 0.68 hours. The frames were integrated with the Bruker SAINT software package using a narrow-frame algorithm. The integration of the data using a monoclinic unit cell yielded a total of 18073 reflections to a maximum  $\theta$  angle of 72.36° (0.81 Å resolution), of which 4399 were independent (average redundancy 4.108, completeness = 98.2%,  $R_{\text{int}} = 4.06\%$ ,  $R_{\text{sig}} = 4.90\%$ ) and 4005 (91.04%) were greater than  $2\sigma(F^2)$ . The final cell constants of  $a = 10.7112(4)$  Å,  $b = 7.8141(3)$  Å,  $c = 27.003(3)$  Å,  $\beta = 91.978(5)^\circ$ , volume = 2258.8(3) Å<sup>3</sup>, are based upon the refinement of the XYZ-centroids of 8664 reflections above  $20\sigma(I)$  with  $11.78^\circ < 2\theta < 144.7^\circ$ . Data were corrected for absorption effects using the Multi-Scan method (SADABS). The ratio of minimum to maximum apparent transmission was 0.880.

The structure was solved and refined using the Bruker SHELXTL Software Package, using the space group  $P 2_1/n$ , with  $Z = 4$  for the formula unit, C<sub>31</sub>H<sub>23</sub>NO<sub>3</sub>. The final anisotropic full-matrix least-squares refinement on  $F^2$  with 319 variables converged at  $R_1 = 5.94\%$ , for the observed data and  $wR_2 = 16.74\%$  for all data. The goodness-of-fit was 1.032. The largest peak in the final difference electron density synthesis was 0.410 e<sup>-</sup>/Å<sup>3</sup> and the largest hole was -0.353 e<sup>-</sup>/Å<sup>3</sup> with an RMS deviation of 0.074 e<sup>-</sup>/Å<sup>3</sup>. On the basis of the final model, the calculated density was 1.345 g/cm<sup>3</sup> and F(000), 960 e<sup>-</sup>.

**Table S3.** Sample and crystal data for compound **1**.

---

|                               |                                                 |                           |
|-------------------------------|-------------------------------------------------|---------------------------|
| <b>Identification code</b>    | Compound <b>1</b>                               |                           |
| <b>Chemical formula</b>       | C <sub>31</sub> H <sub>23</sub> NO <sub>3</sub> |                           |
| <b>Formula weight</b>         | 457.50 g/mol                                    |                           |
| <b>Temperature</b>            | 120(0) K                                        |                           |
| <b>Wavelength</b>             | 1.54178 Å                                       |                           |
| <b>Crystal system</b>         | monoclinic                                      |                           |
| <b>Space group</b>            | <i>P2<sub>1</sub>/n</i>                         |                           |
| <b>Unit cell dimensions</b>   | $a = 10.7112(4) \text{ \AA}$                    | $\alpha = 90^\circ$       |
|                               | $b = 7.8141(3) \text{ \AA}$                     | $\beta = 91.978(5)^\circ$ |
|                               | $c = 27.003(3) \text{ \AA}$                     | $\gamma = 90^\circ$       |
| <b>Volume</b>                 | 2258.8(3) Å <sup>3</sup>                        |                           |
| <b>Z</b>                      | 4                                               |                           |
| <b>Density (calculated)</b>   | 1.345 g/cm <sup>3</sup>                         |                           |
| <b>Absorption coefficient</b> | 0.688 mm <sup>-1</sup>                          |                           |
| <b>F(000)</b>                 | 960                                             |                           |

---

**Table S4.** Data collection and structure refinement for compound **1**.

|                                                |                                                                                     |                                  |
|------------------------------------------------|-------------------------------------------------------------------------------------|----------------------------------|
| <b>Diffractometer</b>                          | Bruker D8 goniometer                                                                |                                  |
| <b>Radiation source</b>                        | sealed tube (CuK $\alpha$ , $\lambda = 1.54178 \text{ \AA}$ )                       |                                  |
| <b>Theta range for data collection</b>         | 4.39 to 72.36 $^\circ$                                                              |                                  |
| <b>Index ranges</b>                            | -13 $\leq h \leq 13$ , -9 $\leq k \leq 9$ , -33 $\leq l \leq 30$                    |                                  |
| <b>Reflections collected</b>                   |                                                                                     | 18073                            |
| <b>Independent reflections</b>                 | 4399 [ $R(\text{int}) = 0.0406$ ]                                                   |                                  |
| <b>Coverage of independent reflections</b>     |                                                                                     | 98.20%                           |
| <b>Absorption correction</b>                   | Multi-Scan                                                                          |                                  |
| <b>Structure solution technique</b>            | direct methods                                                                      |                                  |
| <b>Structure solution program</b>              | XT, VERSION 2018/2                                                                  |                                  |
| <b>Refinement method</b>                       | Full-matrix least-squares on $F^2$                                                  |                                  |
| <b>Refinement program</b>                      | SHELXL-2019/1 (Sheldrick, 2019)                                                     |                                  |
| <b>Function minimized</b>                      | $\Sigma w(F_o^2 - F_c^2)^2$                                                         |                                  |
| <b>Data / restraints / parameters</b>          | 4399 / 0 / 319                                                                      |                                  |
| <b>Goodness-of-fit on <math>F^2</math></b>     |                                                                                     | 1.032                            |
| <b><math>\Delta/\sigma_{\text{max}}</math></b> |                                                                                     | 0.001                            |
| <b>Final R indices</b>                         | 4005 data; $I > 2\sigma(I)$                                                         | $R_1 = 0.0594$ , $wR_2 = 0.1603$ |
|                                                | all data                                                                            | $R_1 = 0.0630$ , $wR_2 = 0.1674$ |
| <b>Weighting scheme</b>                        | $w = 1/[\sigma^2(F_o^2) + (0.1207P)^2 + 0.4417P]$<br>where $P = (F_o^2 + 2F_c^2)/3$ |                                  |
| <b>Largest diff. peak and hole</b>             | 0.410 and -0.353 $e\text{\AA}^{-3}$                                                 |                                  |
| <b>R.M.S. deviation from mean</b>              | 0.074 $e\text{\AA}^{-3}$                                                            |                                  |

**Table S5.** Atomic coordinates and equivalent isotropic atomic displacement parameters ( $\text{\AA}^2$ ) for compound **1**.

|      | <b>x/a</b>  | <b>y/b</b>  | <b>z/c</b> | <b>U(eq)</b> |
|------|-------------|-------------|------------|--------------|
| O001 | 0.92238(9)  | 0.23656(12) | 0.49556(3) | 0.0258(3)    |
| O002 | 0.56319(10) | 0.22164(15) | 0.58498(4) | 0.0339(3)    |
| O003 | 0.33766(11) | 0.10790(16) | 0.56231(5) | 0.0435(3)    |
| N004 | 0.14852(11) | 0.05660(15) | 0.41482(4) | 0.0284(3)    |
| C005 | 0.77771(12) | 0.45876(17) | 0.59739(5) | 0.0249(3)    |
| C006 | 0.91280(12) | 0.32736(16) | 0.53854(5) | 0.0233(3)    |
| C007 | 0.04534(12) | 0.19885(17) | 0.47999(5) | 0.0242(3)    |
| C008 | 0.87982(12) | 0.50494(16) | 0.62831(5) | 0.0246(3)    |
| C009 | 0.79121(12) | 0.37293(17) | 0.55248(5) | 0.0240(3)    |
| C00A | 0.99857(13) | 0.46259(18) | 0.61225(5) | 0.0264(3)    |
| C00B | 0.68177(12) | 0.33183(17) | 0.51907(5) | 0.0257(3)    |
| C00C | 0.03729(13) | 0.11112(16) | 0.43025(5) | 0.0248(3)    |
| C00D | 0.01526(12) | 0.37336(17) | 0.56872(5) | 0.0255(3)    |
| C00E | 0.68651(12) | 0.36624(17) | 0.46850(5) | 0.0264(3)    |
| C00F | 0.57242(13) | 0.25650(18) | 0.53623(5) | 0.0275(3)    |
| C00G | 0.86512(13) | 0.59291(17) | 0.67683(5) | 0.0266(3)    |
| C00H | 0.47422(13) | 0.21371(19) | 0.50192(6) | 0.0304(3)    |
| C00I | 0.14981(15) | 0.98035(19) | 0.37053(5) | 0.0317(3)    |
| C00J | 0.59101(13) | 0.32365(18) | 0.43376(5) | 0.0292(3)    |
| C00K | 0.92638(14) | 0.09071(19) | 0.40299(5) | 0.0303(3)    |
| C00L | 0.75442(14) | 0.67566(19) | 0.68874(5) | 0.0322(3)    |
| C00M | 0.48494(13) | 0.24537(19) | 0.45127(6) | 0.0310(3)    |
| C00N | 0.61008(13) | 0.3565(2)   | 0.38017(5) | 0.0328(3)    |
| C00O | 0.04433(16) | 0.9561(2)   | 0.34013(5) | 0.0352(4)    |
| C00P | 0.93087(16) | 0.0119(2)   | 0.35704(6) | 0.0368(4)    |
| C00Q | 0.95051(16) | 0.6756(2)   | 0.75798(6) | 0.0384(4)    |
| C00R | 0.96298(14) | 0.5954(2)   | 0.71251(5) | 0.0329(3)    |
| C00S | 0.74195(16) | 0.7565(2)   | 0.73410(6) | 0.0377(4)    |
| C00T | 0.36071(14) | 0.1320(2)   | 0.51854(6) | 0.0362(4)    |
| C00U | 0.83979(17) | 0.7566(2)   | 0.76919(6) | 0.0383(4)    |
| C00V | 0.66310(15) | 0.5097(2)   | 0.36475(6) | 0.0363(4)    |
| C00W | 0.58051(16) | 0.2321(2)   | 0.34455(6) | 0.0425(4)    |
| C00X | 0.68751(16) | 0.5372(3)   | 0.31504(6) | 0.0453(4)    |
| C00Y | 0.60531(19) | 0.2608(3)   | 0.29486(7) | 0.0536(5)    |
| C00Z | 0.65892(18) | 0.4114(3)   | 0.28025(6) | 0.0534(5)    |

**Table S6.** Bond lengths (Å) for compound **1**.

|           |            |           |            |
|-----------|------------|-----------|------------|
| O001-C006 | 1.3672(16) | O001-C007 | 1.4270(16) |
| O002-C00F | 1.3512(18) | O003-C00T | 1.230(2)   |
| N004-C00I | 1.3366(19) | N004-C00C | 1.3449(18) |
| C005-C009 | 1.3976(19) | C005-C008 | 1.4001(19) |
| C006-C00D | 1.3914(19) | C006-C009 | 1.4137(18) |
| C007-C00C | 1.5079(18) | C008-C00A | 1.3977(19) |
| C008-C00G | 1.4927(19) | C009-C00B | 1.4894(18) |
| C00A-C00D | 1.3834(19) | C00B-C00E | 1.395(2)   |
| C00B-C00F | 1.404(2)   | C00C-C00K | 1.385(2)   |
| C00E-C00J | 1.4038(19) | C00F-C00H | 1.418(2)   |
| C00G-C00L | 1.398(2)   | C00G-C00R | 1.399(2)   |
| C00H-C00M | 1.398(2)   | C00H-C00T | 1.458(2)   |
| C00I-C00O | 1.386(2)   | C00J-C00M | 1.388(2)   |
| C00J-C00N | 1.491(2)   | C00K-C00P | 1.388(2)   |
| C00L-C00S | 1.389(2)   | C00N-C00V | 1.395(2)   |
| C00N-C00W | 1.396(2)   | C00O-C00P | 1.383(2)   |
| C00Q-C00U | 1.387(3)   | C00Q-C00R | 1.389(2)   |
| C00S-C00U | 1.388(3)   | C00V-C00X | 1.393(2)   |
| C00W-C00Y | 1.395(3)   | C00X-C00Z | 1.387(3)   |
| C00Y-C00Z | 1.373(3)   |           |            |

**Table S7.** Bond angles (°) for compound **1**.

|                |            |                |            |
|----------------|------------|----------------|------------|
| C006-O001-C007 | 117.02(10) | C001-N004-C00C | 117.06(12) |
| C009-C005-C008 | 122.61(12) | O001-C006-C00D | 123.40(12) |
| O001-C006-C009 | 116.98(11) | C00D-C006-C009 | 119.61(12) |
| O001-C007-C00C | 109.35(11) | C00A-C008-C005 | 117.03(12) |
| C00A-C008-C00G | 120.40(12) | C005-C008-C00G | 122.56(12) |
| C005-C009-C006 | 118.41(12) | C005-C009-C00B | 121.75(12) |
| C006-C009-C00B | 119.83(12) | C00D-C00A-C008 | 121.91(12) |
| C00E-C00B-C00F | 117.59(12) | C00E-C00B-C009 | 119.81(12) |
| C00F-C00B-C009 | 122.59(12) | N004-C00C-C00K | 123.48(12) |
| N004-C00C-C007 | 113.32(12) | C00K-C00C-C007 | 123.19(12) |
| C00A-C00D-C006 | 120.35(12) | C00B-C00E-C00J | 123.94(13) |
| O002-C00F-C00B | 119.74(12) | O002-C00F-C00H | 120.77(13) |
| C00B-C00F-C00H | 119.46(13) | C00L-C00G-C00R | 117.16(13) |
| C00L-C00G-C008 | 122.07(13) | C00R-C00G-C008 | 120.77(13) |
| C00M-C00H-C00F | 120.89(13) | C00M-C00H-C00T | 118.43(13) |
| C00F-C00H-C00T | 120.66(14) | N004-C00I-C00O | 123.87(14) |
| C00M-C00J-C00E | 117.59(13) | C00M-C00J-C00N | 123.22(13) |
| C00E-C00J-C00N | 119.12(13) | C00C-C00K-C00P | 118.09(13) |
| C00S-C00L-C00G | 121.44(14) | C00J-C00M-C00H | 120.46(13) |
| C00V-C00N-C00W | 118.50(15) | C00V-C00N-C00J | 120.57(14) |
| C00W-C00N-C00J | 120.87(15) | C00P-C00O-C00I | 117.95(13) |
| C00O-C00P-C00K | 119.53(14) | C00U-C00Q-C00R | 120.52(15) |
| C00Q-C00R-C00G | 121.48(14) | C00U-C00S-C00L | 120.59(14) |
| O003-C00T-C00H | 124.07(14) | C00Q-C00U-C00S | 118.80(13) |
| C00X-C00V-C00N | 120.80(16) | C00Y-C00W-C00N | 120.29(18) |
| C00Z-C00X-C00V | 119.93(19) | C00Z-C00Y-C00W | 120.62(18) |
| C00Y-C00Z-C00X | 119.85(16) |                |            |

**Table S8.** Anisotropic atomic displacement parameters ( $\text{\AA}^2$ ) compound **1**.The anisotropic atomic displacement factor exponent takes the form:  $-2\pi^2[ h^2 a^{*2} U_{11} + \dots + 2 h k a^* b^* U_{12} ]$ 

|      | $U_{11}$   | $U_{22}$   | $U_{33}$  | $U_{23}$   | $U_{13}$   | $U_{12}$   |
|------|------------|------------|-----------|------------|------------|------------|
| O001 | 0.0218(5)  | 0.0299(5)  | 0.0258(5) | -0.0042(4) | 0.0019(4)  | 0.0004(4)  |
| O002 | 0.0254(5)  | 0.0431(6)  | 0.0336(6) | -0.0011(4) | 0.0059(4)  | -0.0049(4) |
| O003 | 0.0287(6)  | 0.0497(7)  | 0.0529(7) | -0.0099(5) | 0.0120(5)  | -0.0086(5) |
| N004 | 0.0300(6)  | 0.0270(6)  | 0.0285(6) | 0.0004(4)  | 0.0062(5)  | 0.0016(4)  |
| C005 | 0.0234(6)  | 0.0234(6)  | 0.0280(6) | 0.0011(5)  | 0.0041(5)  | 0.0009(5)  |
| C006 | 0.0253(6)  | 0.0216(6)  | 0.0229(6) | 0.0008(5)  | 0.0023(5)  | -0.0010(5) |
| C007 | 0.0212(6)  | 0.0253(6)  | 0.0263(6) | -0.0006(5) | 0.0026(5)  | -0.0002(5) |
| C008 | 0.0273(7)  | 0.0210(6)  | 0.0255(6) | 0.0025(5)  | 0.0017(5)  | -0.0013(5) |
| C009 | 0.0227(6)  | 0.0231(6)  | 0.0263(6) | 0.0017(5)  | 0.0012(5)  | -0.0011(5) |
| C00A | 0.0243(6)  | 0.0275(7)  | 0.0271(6) | -0.0001(5) | -0.0013(5) | -0.0025(5) |
| C00B | 0.0223(6)  | 0.0243(6)  | 0.0306(7) | -0.0033(5) | 0.0006(5)  | 0.0022(5)  |
| C00C | 0.0284(7)  | 0.0215(6)  | 0.0248(6) | 0.0027(5)  | 0.0037(5)  | -0.0005(5) |
| C00D | 0.0225(6)  | 0.0259(6)  | 0.0284(7) | 0.0011(5)  | 0.0034(5)  | -0.0002(5) |
| C00E | 0.0230(6)  | 0.0257(6)  | 0.0305(7) | -0.0018(5) | 0.0001(5)  | 0.0022(5)  |
| C00F | 0.0232(6)  | 0.0278(7)  | 0.0317(7) | -0.0041(5) | 0.0027(5)  | 0.0022(5)  |
| C00G | 0.0314(7)  | 0.0218(6)  | 0.0267(7) | 0.0015(5)  | 0.0039(5)  | -0.0033(5) |
| C00H | 0.0207(6)  | 0.0303(7)  | 0.0402(8) | -0.0072(6) | 0.0013(5)  | 0.0030(5)  |
| C00I | 0.0371(8)  | 0.0281(7)  | 0.0305(7) | 0.0001(5)  | 0.0098(6)  | 0.0027(5)  |
| C00J | 0.0265(7)  | 0.0291(7)  | 0.0317(7) | -0.0041(5) | -0.0021(5) | 0.0056(5)  |
| C00K | 0.0280(7)  | 0.0313(7)  | 0.0316(7) | -0.0018(5) | 0.0024(5)  | -0.0002(5) |
| C00L | 0.0350(8)  | 0.0316(7)  | 0.0302(7) | -0.0010(6) | 0.0028(6)  | 0.0030(6)  |
| C00M | 0.0237(7)  | 0.0320(7)  | 0.0370(8) | -0.0082(6) | -0.0047(5) | 0.0044(5)  |
| C00N | 0.0245(7)  | 0.0413(8)  | 0.0321(8) | -0.0026(6) | -0.0047(5) | 0.0084(6)  |
| C00O | 0.0462(9)  | 0.0329(7)  | 0.0270(7) | -0.0046(6) | 0.0068(6)  | -0.0014(6) |
| C00P | 0.0382(8)  | 0.0415(8)  | 0.0305(7) | -0.0050(6) | -0.0025(6) | -0.0035(6) |
| C00Q | 0.0433(9)  | 0.0411(9)  | 0.0308(7) | -0.0060(6) | -0.0017(6) | -0.0056(7) |
| C00R | 0.0330(7)  | 0.0354(7)  | 0.0305(7) | -0.0031(6) | 0.0028(6)  | -0.0011(6) |
| C00S | 0.0432(9)  | 0.0336(8)  | 0.0370(8) | -0.0034(6) | 0.0116(7)  | 0.0060(6)  |
| C00T | 0.0229(7)  | 0.0386(8)  | 0.0474(9) | -0.0110(6) | 0.0047(6)  | -0.0006(6) |
| C00U | 0.0547(10) | 0.0322(8)  | 0.0284(7) | -0.0070(6) | 0.0081(7)  | -0.0038(6) |
| C00V | 0.0313(8)  | 0.0425(8)  | 0.0347(8) | 0.0012(6)  | -0.0035(6) | 0.0077(6)  |
| C00W | 0.0378(8)  | 0.0531(10) | 0.0361(8) | -0.0077(7) | -0.0048(6) | 0.0012(7)  |
| C00X | 0.0371(9)  | 0.0592(11) | 0.0393(9) | 0.0118(8)  | -0.0029(7) | 0.0077(7)  |
| C00Y | 0.0489(10) | 0.0773(14) | 0.0340(9) | -0.0145(8) | -0.0059(7) | 0.0009(9)  |
| C00Z | 0.0441(9)  | 0.0878(15) | 0.0280(8) | 0.0033(8)  | -0.0037(7) | 0.0084(9)  |

**Table S9.** Hydrogen atomic coordinates and isotropic atomic displacement parameters ( $\text{\AA}^2$ ) for compound **1**.

|      | <b>x/a</b> | <b>y/b</b> | <b>z/c</b> | <b>U(eq)</b> |
|------|------------|------------|------------|--------------|
| H1   | 0.489(3)   | 0.182(3)   | 0.5888(8)  | 0.051        |
| H005 | 0.696      | 0.4869     | 0.6073     | 0.03         |
| H00A | 1.0885     | 0.1236     | 0.5046     | 0.029        |
| H00B | 1.094      | 0.306      | 0.4775     | 0.029        |
| H00C | 1.0699     | 0.4961     | 0.6318     | 0.032        |
| H00D | 1.0971     | 0.3433     | 0.5594     | 0.031        |
| H00E | 0.7587     | 0.4218     | 0.4569     | 0.032        |
| H00I | 1.2276     | -0.0596    | 0.3592     | 0.038        |
| H00K | 0.8495     | 0.1296     | 0.4154     | 0.036        |
| H00L | 0.6862     | 0.6766     | 0.6653     | 0.039        |
| H00M | 0.4191     | 0.213      | 0.4287     | 0.037        |
| H00O | 1.0498     | -0.0971    | 0.3087     | 0.042        |
| H00P | 0.8565     | -0.0037    | 0.3373     | 0.044        |
| H00Q | 1.0184     | 0.675      | 0.7816     | 0.046        |
| H00R | 1.0397     | 0.5409     | 0.7055     | 0.039        |
| H00S | 0.6658     | 0.8122     | 0.7412     | 0.045        |
| H00T | 0.3008     | 0.0951     | 0.4941     | 0.043        |
| H00U | 0.8311     | 0.8112     | 0.8003     | 0.046        |
| H00V | 0.6828     | 0.5963     | 0.3884     | 0.044        |
| H00W | 0.5434     | 0.1274     | 0.3542     | 0.051        |
| H00X | 0.7237     | 0.642      | 0.305      | 0.054        |
| H00Y | 0.5849     | 0.1753     | 0.2709     | 0.064        |
| H00Z | 0.6764     | 0.4293     | 0.2464     | 0.064        |
